# Supplementary material for: Visiting crowded places during the COVID-19 pandemic. A panel study among adult Norwegians
Source: Frontiers journal article supplement (doi:10.3389/fpubh.2022.1076090), 2022-12-15
Supplement: Image_1.pdf [file Image_1.pdf]

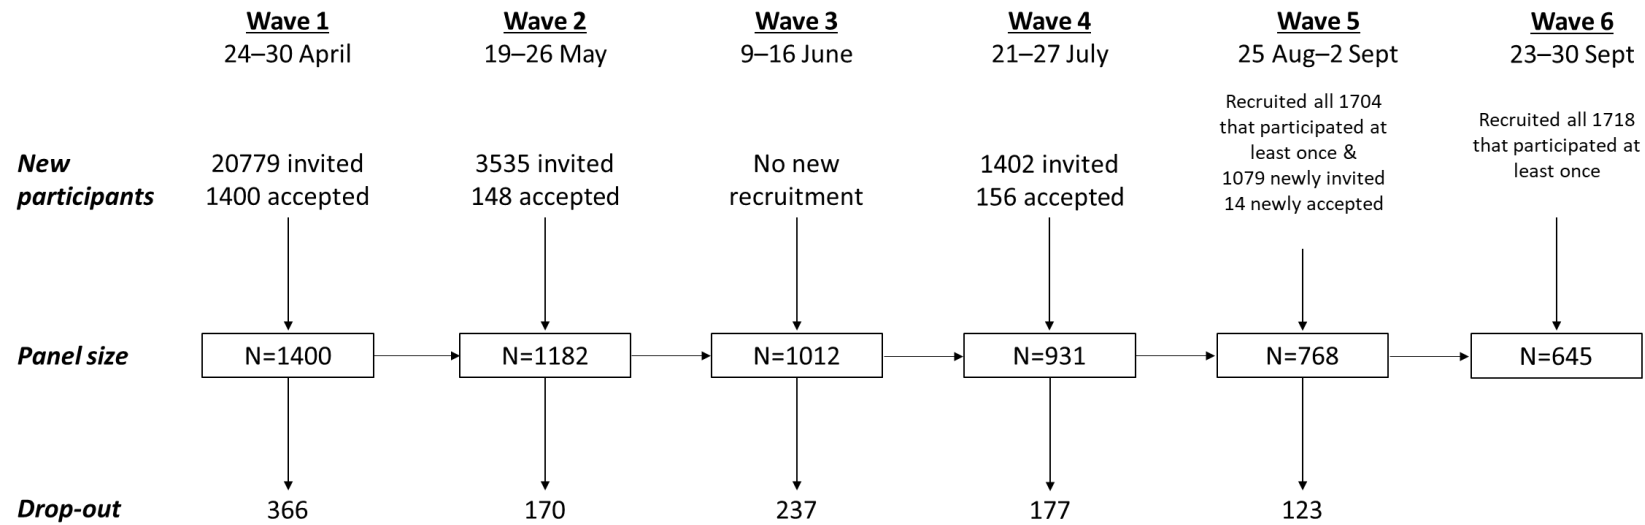

Fig. S1: Recruitment and data collection timeline, CoMix study, April to September 2020, Norway.
